# Supplementary material for: ZIC-cHILIC Functionalized Magnetic Nanoparticle for Rapid and Sensitive Glycopeptide Enrichment from <1 µL Serum
Source: MDPI journal article supplement (doi:10.3390/nano11092159), 2021-08-24
Supplement: s1 [file s1]

# ZIC-cHILIC Functionalized Magnetic Nanoparticle for Rapid and Sensitive Glycopeptide Enrichment from < 1 $\mu$ L Serum

Tiara Pradita <sup>1,2,3</sup>, Yi-Ju Chen <sup>1</sup>, Elias Gizaw Mernie <sup>1</sup>, Sharine Noelle Bendulo <sup>1</sup> and Yu-Ju Chen <sup>1,2,4\*</sup>

<sup>1</sup> Institute of Chemistry, Academia Sinica, Taipei 115, Taiwan; tpradita01@gate.sinica.edu.tw (T.P.); tp7249@gate.sinica.edu.tw (Y.-J.C.); eliasgizaw6@gmail.com (E.G.M.); sobendulo@gmail.com (S.N.B.)

<sup>2</sup> Sustainable Chemical Science and Technology, Taiwan International Graduate Program, Academia Sinica, Taipei 115, Taiwan

<sup>3</sup> Department of Applied Chemistry, National Yang Ming Chiao Tung University, Hsinchu 300, Taiwan

<sup>4</sup> Department of Chemistry, National Taiwan University, Taipei 106, Taiwan

\* Correspondence: yujuchen@gate.sinica.edu.tw; Tel.: +886-2-5572-8660

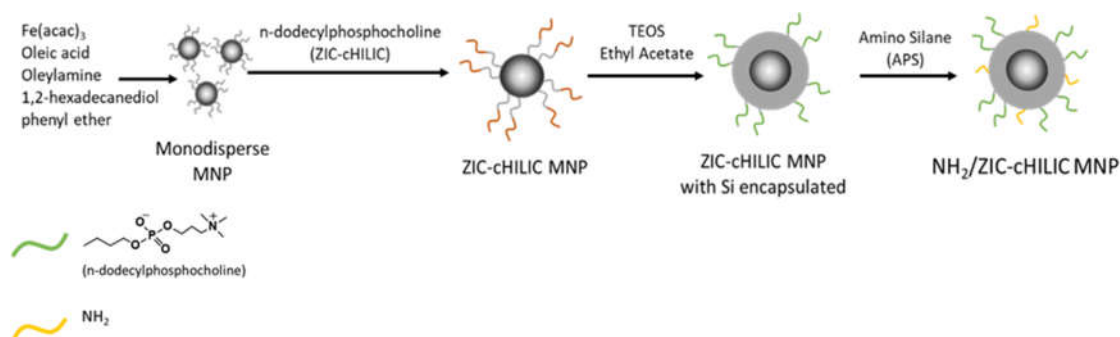

**Figure S1.** Synthetic route of ZIC-cHILIC@MNPs

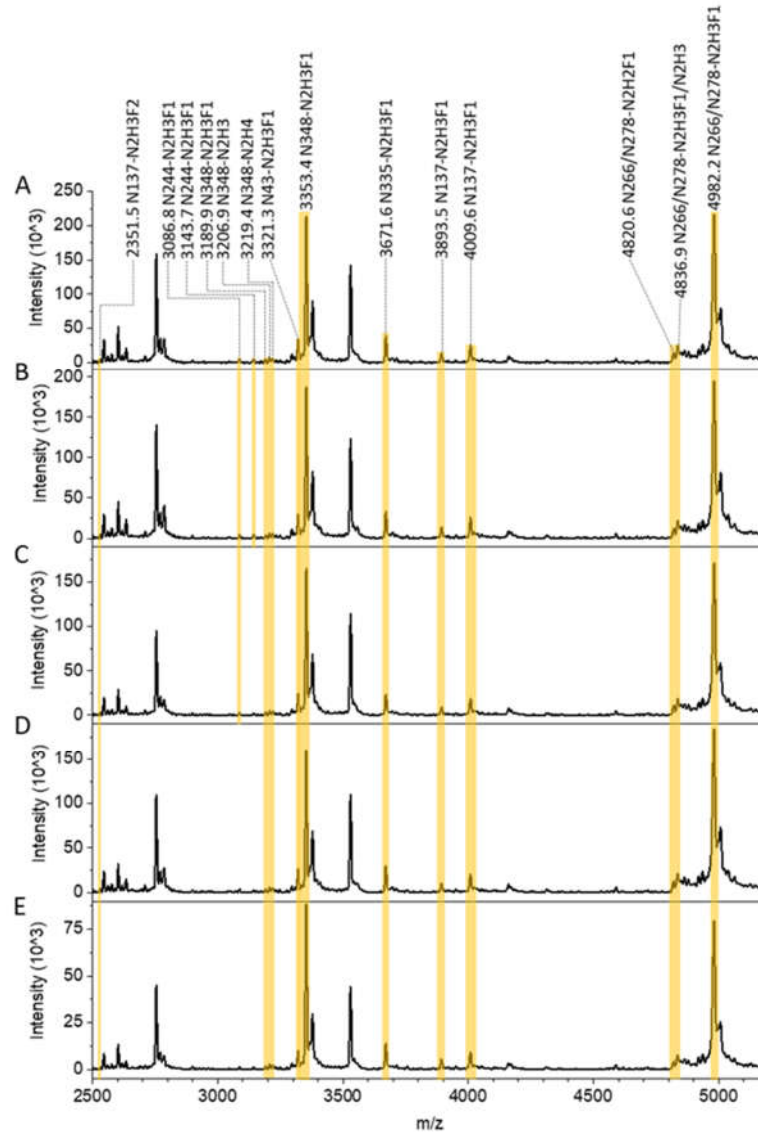

**Figure S2.** Reusability test of ZIC-CHILIC@MNPs for HRP glycopeptide enrichment using MALDI-TOF analysis. The MALDI-TOF spectra of 1st to 5th round of enrichment were presented in (A)–(E).

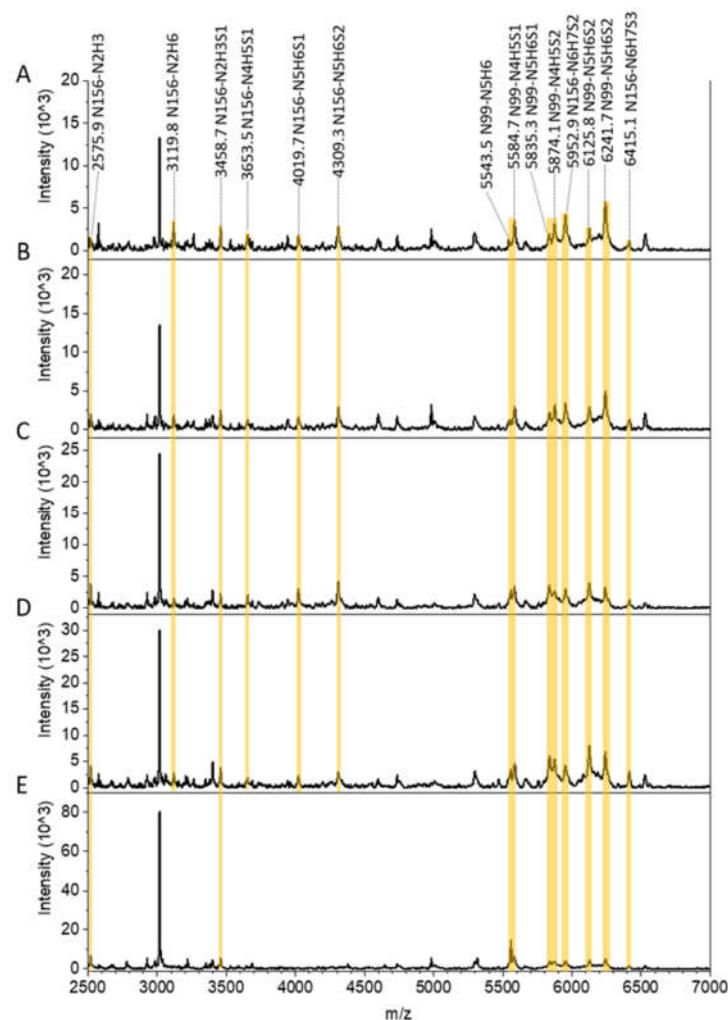

**Figure S3.** Reusability test of ZIC-cHILIC@MNPs for fetuin glycopeptide enrichment using MALDI-TOF analysis. The MALDI-TOF spectra of 1st to 5th round of enrichment were presented in (A)–(E).

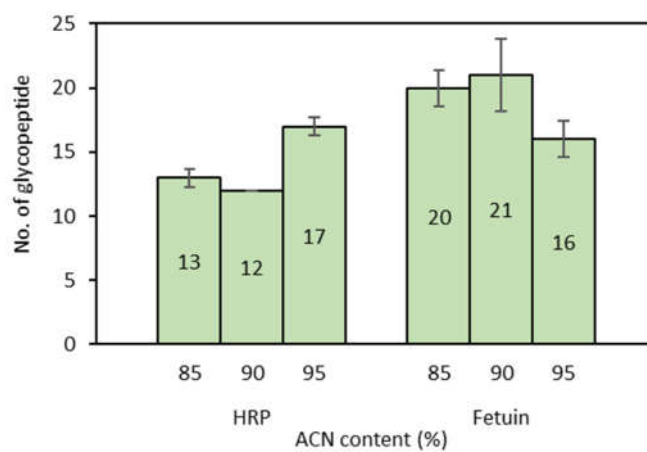

**Figure S4.** Effect of ACN concentration on number of enriched glycopeptides from standard HRP and fetuin using ZIC-cHILIC@MNPs.

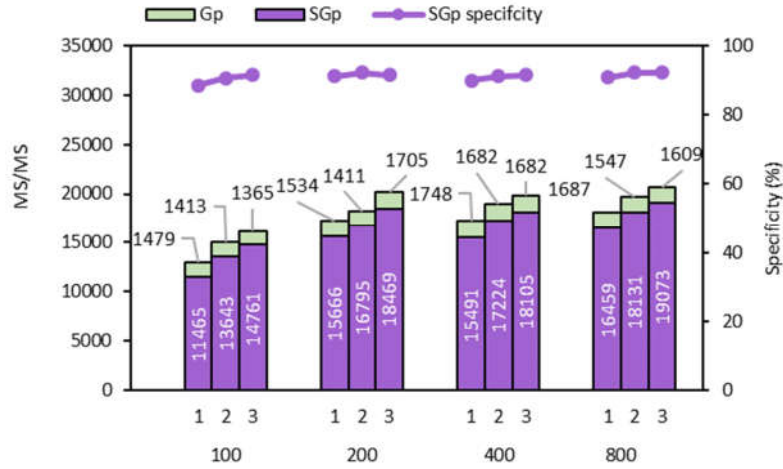

**Figure S5.** Number and specificity of sialylated glycopeptides towards total glycopeptides in MS/MS level from one of HCC patient serum.

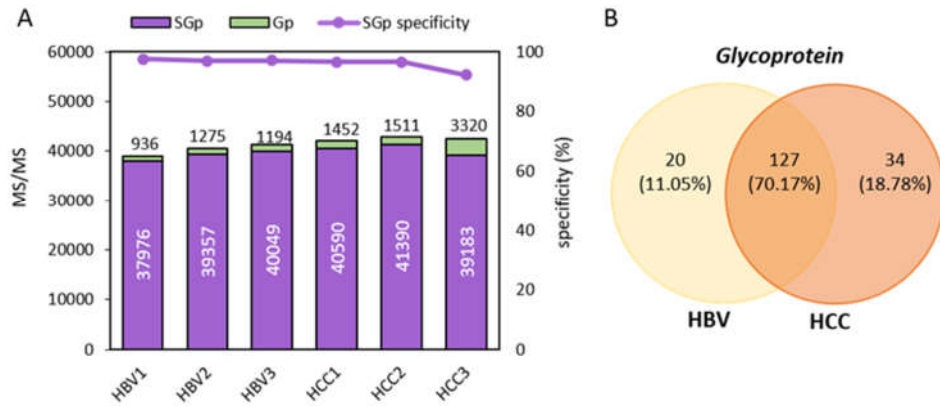

**Figure S6. (A)** Sialo-glycopeptide specificity towards total glycopeptides in MS/MS level from individual HBV ( $n=3$ ) and HCC ( $n=3$ ) patient serum. **(B)** Venn diagram of identified glycoproteins from two patient cohorts.

**Table S1.** Zeta potential measurement of core MNPs and ZIC-cHILIC@MNPs.

| Material                                 | Zeta Potential (mV) | STDEV |
|------------------------------------------|---------------------|-------|
| Fe <sub>3</sub> O <sub>4</sub> Core MNPs | -1.62               | ±20.2 |
| Fe <sub>3</sub> O <sub>4</sub> Core MNPs | -22.20              | ±4.8  |

**Table S2.** List of glycopeptides enriched from HRP by using ZIC-cHILIC@MNPs.

| Scheme . | m/z    | Site      | Motif   | Peptide Sequence                 | Modifications     | Glycan          |
|----------|--------|-----------|---------|----------------------------------|-------------------|-----------------|
| GH1      | 1842.8 | N234      | NVG     | NVGLNR                           |                   | N2H3cF1         |
| GH2      | 2531.5 | N137      | NTT     | ASILLDNTTSFR                     | Deamidation       | N2H3cF2         |
| GH3      | 3086.8 | N244      | NLS     | GLCPLNGNLSALVDFDLR               |                   | N2H3cF1         |
| GH4      | 3143.7 | N244      | NLS     | GLCPLNGNLSALVDFDLR               | Carbamidomethyl   | N2H3cF1         |
| GH5      | 3190.6 | N348      | NST     | SFANSTQTFNFAFVEAMDR              |                   | N2H2cF1         |
| GH6      | 3207.4 | N348      | NST     | SFANSTQTFNFAFVEAMDR              |                   | N2H3            |
| GH7      | 3222.5 | N348      | NST     | SFANSTQTFNFAFVEAMDR              | Methylation       | N2H4            |
| GH8      | 3299.5 | N238      | NRS     | NVGLNRSSDLVALSGGHTFGK            |                   | N2H3cF1         |
| GH9      | 3321.6 | N43       | NVS     | QLTPTFYDNSCPNVSNIVR              |                   | N2H3cF1         |
| GH10     | 3353.4 | N348      | NST     | SFANSTQTFNFAFVEAMDR              |                   | N2H3cF1         |
| GH11     | 3369.5 | N348      | NST     | SFANSTQTFNFAFVEAMDR              | Oxidation (M)     | N2H3cF1         |
| GH12     | 3671.7 | N335      | NAT     | GLIQSDQELFSSPNATDTIPLVR          |                   | N2H3cF1         |
| GH13     | 3895.7 | N137      | NTT     | LHFHDCFVNGCDASILLDNTTSF<br>R     |                   | N2H3cF1         |
| GH14     | 4009.7 | N137      | NTT     | LHFHDCFVNGCDASILLDNTTSF<br>R     | 2xCarbamidomethyl | N2H3cF1         |
| GH15     | 4024.7 | N137      | NTT     | LHFHDCFVNGCDASILLDNTTSF<br>R     | 2xCarbamidomethyl | N2H3cF2         |
| GH16     | 4056.0 | N43       | NVS     | QLTPTFYDNSCAAVESACPRPNV<br>SNIVR | -H <sub>2</sub> O | N2H3            |
| GH17     | 4164.8 | N137      | NTT     | LHFHDCFVNGCDASILLDNTTSF<br>RTEK  | Carbamidomethyl   | N2H3            |
| GH18     | 4821.7 | N266/N278 | NFS/NTT | LYNFSNTGLPDPTLNNTTYLQTLR         |                   | N2H2cF1/N2H2cF1 |
| GH19     | 4837.1 | N266/N278 | NFS/NTT | LYNFSNTGLPDPTLNNTTYLQTLR         |                   | N2H3/N2H3cF1    |
| GH20     | 4983.2 | N266/N278 | NFS/NTT | LYNFSNTGLPDPTLNNTTYLQTLR         |                   | N2H3cF1/N2H3cF1 |

**Table S3.** List of glycopeptides enriched from fetuin by using ZIC-cHILIC@MNPs.

| Scheme . | m/z    | Site | Motif | Peptide Sequence                     | Modifications     | Glycan   |
|----------|--------|------|-------|--------------------------------------|-------------------|----------|
| GF1      | 2576.9 | N156 | NDS   | LCPDCPLLAPLNDSR                      | 1xCarbamidomethyl | N2H3     |
| GF2      | 3040.2 | N156 | NDS   | LCPDCPLLAPLNDSR                      | 2xCarbamidomethyl | N4H3     |
| GF3      | 3121.4 | N156 | NDS   | LCPDCPLLAPLNDSR                      | 2xCarbamidomethyl | N2H6     |
| GF4      | 3219.7 | N176 | NGS   | VVHAVEVALATFNAESNGSYQLVEIS<br>R      |                   | N1       |
| GF5      | 3459.1 | N156 | NDS   | KLCPDCPLLAPLNDSR                     | 2xCarbamidomethyl | N4H3S1   |
| GF6      | 3653.5 | N156 | NDS   | KLCPDCPLLAPLNDSR                     | 2xCarbamidomethyl | N4H5S1   |
| GF7      | 3686.6 | N156 | NDS   | LCPDCPLLAPLNDSR                      |                   | N4H5F1S1 |
| GF8      | 3701.5 | N156 | NDS   | LCPDCPLLAPLNDSR                      | 2xCarbamidomethyl | N5H3S1   |
| GF9      | 4019.7 | N156 | NDS   | LCPDCPLLAPLNDSR                      | 2xCarbamidomethyl | N5H6S1   |
| GF10     | 4173.7 | N156 | NDS   | LCPDCPLLAPLNDSR                      | 2xCarbamidomethyl | N6H3F1S2 |
| GF11     | 4309.3 | N156 | NDS   | LCPDCPLLAPLNDSR                      | 2xCarbamidomethyl | N5H6S2   |
| GF12     | 5038.1 | N156 | NDS   | LCPDCPLLAPLNDSR                      | 1xCarbamidomethyl | N6H7S3   |
| GF13     | 5180.3 | N99  | NCS   | RPTGEVYDIEIDTLETTCHVLDPTPLAN<br>CSVR |                   | N4H5     |
| GF14     | 5469.4 | N99  | NCS   | RPTGEVYDIEIDTLETTCHVLDPTPLAN<br>CSVR |                   | N4H5S1   |
| GF15     | 5545.8 | N99  | NCS   | RPTGEVYDIEIDTLETTCHVLDPTPLAN<br>CSVR |                   | N5H6     |
| GF16     | 5556.9 | N156 | NDS   | CDSSPDSAEDVRKLCPCPLLAPLNDS<br>R      | 2xCarbamidomethyl | N5H6S1   |
| GF17     | 5584.9 | N99  | NCS   | RPTGEVYDIEIDTLETTCHVLDPTPLAN<br>CSVR | 2xCarbamidomethyl | N4H5S1   |
| GF18     | 5662.4 | N156 | NDS   | CDSSPDSAEDVRKLCPCPLLAPLNDS<br>R      |                   | N6H7S1   |
| GF19     | 5758.9 | N156 | NDS   | CDSSPDSAEDVRKLCPCPLLAPLNDS<br>R      | 3xCarbamidomethyl | N5H6S2   |
| GF20     | 5835.8 | N99  | NCS   | RPTGEVYDIEIDTLETTCHVLDPTPLAN<br>CSVR |                   | N5H6S1   |
| GF21     | 5874.1 | N99  | NCS   | RPTGEVYDIEIDTLETTCHVLDPTPLAN<br>CSVR | 2xCarbamidomethyl | N4H5S2   |
| GF22     | 6048.1 | N156 | NDS   | CDSSPDSAEDVRKLCPCPLLAPLNDS<br>R      | 3xCarbamidomethyl | N5H6S2   |
| GF23     | 5951.5 | N156 | NDS   | CDSSPDSAEDVRKLCPCPLLAPLNDS<br>R      |                   | N6H7S2   |
| GF24     | 6124.9 | N99  | NCS   | RPTGEVYDIEIDTLETTCHVLDPTPLAN<br>CSVR |                   | N5H6S2   |
| GF25     | 6242   | N99  | NCS   | RPTGEVYDIEIDTLETTCHVLDPTPLAN<br>CSVR | 2xCarbamidomethyl | N5H6S2   |
| GF26     | 6413.1 | N156 | NDS   | CDSSPDSAEDVRKLCPCPLLAPLNDS<br>R      | 3xCarbamidomethyl | N6H7S3   |
| GF27     | 6534.1 | N156 | NDS   | CDSSPDSAEDVRKLCPCPLLAPLNDS<br>R      |                   | N6H7S4   |
| GF28     | 7190.4 | N99  | NCS   | RPTGEVYDIEIDTLETTCHVLDPTPLAN<br>CSVR | 2xCarbamidomethyl | N6H7S4   |
